das Niveau der Nullströmung nicht im allgemeinen mit dem Niveau, wo die isobaren Flächen horizontal verlaufen, identisch ist.

Da die Ergebnisse natürlich sehr eng mit den angenommenen Voraussetzungen zusammenhängen, und da besonders bei kräftiger Schichtung im Ozean die Annahme eines konstanten Koeffizienten der Turbulenzreibung wohl kaum aufrecht erhalten werden kann, wäre es sehr interessant, empirische Bestätigungen der theoretischen Ergebnisse zu erhalten, wie auch weitere Annäherungen an die tatsächlichen Verhältnisse vorzunehmen.

E. P.

**V. W. Ekman.** "Studien zur Dynamik der Meeresströmungen". Gerlands Beitr. z. Geophysik, Bd. XXXVI, S. 385—438. Leipzig, 1932.

Mit dieser Arbeit ist, so darf man wohl sagen, die Ekman'sche Theorie in eine dritte Stufe der Entwicklung eingetreten. Die älteste Theorie (1902, 1905, elementar dargestellt 1906 in Ann. d. Hydr.) rügte an den früheren Anschauungen die Vernachlässigung von Turbulenz und ablenkender Kraft der Erdrotation und gipfelte in einer Gliederung der Ströme in drei Stockwerke: Von oben reichte bis zur "oberen Reibungstiefe"  $D'$  der unmittelbare Einfluss des Windes durch die Turbulenz (Oberstrom), und vom Meeresboden bis zur unteren Reibungstiefe ( $D''$  über dem Boden—Bodenstrom) die Bremswirkung der Bodenhindernisse. Dazwischen aber floss, praktisch nicht beeinflusst von Reibung, ein homogener Tiefenstrom, der wegen seiner Mächtigkeit für die Verfrachtung des Wassers von grosser Bedeutung ist, und auf dessen Untersuchung sich daher die weitere Entwicklung der Theorie konzentrierte. Eine wichtige Voraussetzung der ältesten Theorie war die eines konstanten Windes, konstanter Meerestiefe und konstanter geographischer Breite. Das erwähnte Stromsystem konnte deshalb zunächst jedesmal nur für verhältnismässig kleine Gebiete gelten ("Elementarstrom"), und die zweite Entwicklungsstufe der Theorie war infolgedessen durch die Frage gegeben, was insbesondere aus dem Tiefenstrom wird, wenn die obigen drei Voraussetzungen aufgegeben werden: "ältere Theorie" (1923, von Ekman in diesen Blättern dargestellt, Bd III, 1928, S. 295—327). Die Antwort ging dahin, dass entsprechend den Ungleichmässigkeiten des Windes, der Meerestiefe und der geographischen Breite anemogene, topographische und planetarische Wirbelwirkungen auftreten, die im Tiefenstrome Wirbel und Zerrungen auslösen, welche unter der Bezeichnung "Quasiwirbel" zusammengefasst werden können, und welche so beträchtlich sind, dass sie dem Tiefenstrom in vielen Fällen keinen Raum zur Entwicklung lassen.

Die neue Theorie geht wiederum einen Schritt weiter, indem sie auch Beschleunigungen zulässt; solche können auch bei stationären Strömen, und von anderen ist keine Rede, vorkommen, weil Wasserteilchen bei ihrer Bewegung an Orte mit anderer Geschwindigkeit gelangen, also ihren Bewegungszustand ändern. Zu dem Quasiwirbel kommt infolgedessen eine Wirbelbeschleunigung hinzu, und dadurch wird die mathematische Aufgabe so verwickelt, dass vollständige Lösungen kaum mehr möglich sind. Es ergibt sich, dass die Wirbelwirkung einmal etwas herabgesetzt wird, andererseits aber sich örtlich verlagert, indem z. B. für die topographische Wirbelwirkung nicht mehr der Böschungswinkel des Bodens allein den Ausschlag gibt, sondern auch die Lage der tiefsten (oder höchsten) Stelle des Grundes und das Verhältnis des Tiefenunterschieds zur Gesamttiefe von Bedeutung ist. Ferner lassen sich topographische und planetarische Wirkung nicht mehr völlig von einander trennen, sondern sind mit einander verkoppelt. Der Abschwächung der Wirbelwirkung durch Hinzutreten der Beschleunigung

steht andererseits gegenüber eine Verstärkung, dadurch, dass der Koeffizient der Scheinreibung nicht, wie früher der Einfachheit halber angenommen, konstant, sondern am Boden kleiner als weiter oben ist; um dieser Tatsache gerecht zu werden, nimmt die neue Theorie in Anlehnung an eine Vorstellung G. I. Taylors und eine ältere Vermutung Ekman's eine besondere Gleitschicht am Boden an.

Ausser den Beschleunigungen und ausser der Veränderlichkeit des Reibungskoeffizienten werden endlich auch die senkrechten Komponenten sowohl der Ablenkungskraft, als auch des Stroms selbst berücksichtigt; doch stellt sich die erstere mit Sicherheit, die letztere wahrscheinlich als belanglos heraus. Zusammenfassend kann man von der "neuen Theorie" daher sagen, dass zwar die Aufgabe zu verwickelt wird, um vollständige Lösungen zuzulassen, dass aber die Hindernisse, welche die Kugelgestalt der Erde und die Bodenformen einer Ausbildung kräftiger Tiefenströme entgegenstellen, auch unter den Voraussetzungen der neuen Theorie noch in den meisten Fällen zu ihrer Zerstörung ausreichen dürften.

*H. Thorade.*

- I. **T. Gaarder und R. Spärck.** "Hydrographisch-biochemische Untersuchungen in norwegischen Austern-Pollen." Bergens Museums Årbok 1932, Naturvidenskabelig rekke Nr. 1. Bergen, 1932.
- II. **T. Gaarder.** Untersuchungen über Produktions- und Lebensbedingungen in norwegischen Austern-Pollen. Ibid., Naturvidenskabelig rekke Nr. 3. Bergen, 1933.

Die eigenartigen hydrographischen Verhältnisse der norwegischen Austernpollen sind durch die Arbeiten von Helland-Hansen in ihren Hauptzügen bekannt geworden. Neuerdings sind durch das Zoophysiologische Institut in Kopenhagen und das Museum in Bergen wieder eingehende Untersuchungen der biochemischen und produktionsbiologischen Verhältnisse dieser Gewässer aufgenommen worden mit dem Ziele, die Faktoren nachzuweisen, welche die von Jahr zu Jahr schwankenden Erträge der Austernpollen bedingen. Diese Untersuchungen, über deren Ergebnisse noch weitere Veröffentlichungen zu erwarten sind, dürfen allgemeines Interesse beanspruchen, da sie an dem Beispiele eines abgeschlossenen Salzwassersees sehr lehrreiche Aufschlüsse geben über die Zustandsänderungen des Wassers unter dem Einflusse der meteorologischen Verhältnisse und deren Auswirkungen auf das Mikroplankton und auf die sich davon ernährenden Zooplanktonen.

I. In der erstgenannten Arbeit wird zunächst eine Lagebeschreibung des Espevik-Polles und des Sælø-Polles gegeben, in denen während der Sommermonate der Jahre 1927 bis 1929 Beobachtungen angestellt wurden. Dies sind kleine Salzwasserbecken von 200—300 m. Durchmesser und 4—5 m. Wassertiefe, durch eine Felsbarre vom offenen Fjord abgetrennt, mit dem sie durch einen Kanal in Verbindung stehen. Dieser wird im Sommer geschlossen, und über dem im Poll abgesperrten Meerwasser schichtet sich nun das durch Niederschläge und Rinnsale zugeführte Süßwasser, eine Oberflächenschicht von Brackwasser bildend. Sie wirkt wie die Glasfenster eines Treibhauses, indem sie die Sonnenstrahlen in das darunter liegende Salzwasser eintreten lässt, das sich dadurch erwärmt, schützt es jedoch während der Nacht vor Wärmeverlust. So werden Temperaturen von 30° und mehr erreicht, die für diese Breitengrade ganz aussergewöhnlich sind.

Der Espevik-Poll ist seit 1882 ununterbrochen in Betrieb; in ihm werden in guten Jahren  $\frac{1}{2}$  bis 1 Million Jungaustern gewonnen. Ihm galt deshalb vornehmlich das Interesse der Untersucher. Alle drei Tage etwa wurden
